# Supplementary material for: Solution processed F doped ZnO (ZnO:F) for thin film transistors and improved stability through co-doping with alkali metals
Source: Royal Society of Chemistry journal article supplement (doi:10.1039/c4tc02257b), 2014-12-17
Supplement: c4tc02257b1.pdf [file c4tc02257b1.pdf]

*Electronic Supplementary Information for*

**Solution Processed F Doped ZnO (ZnO:F) for Thin Film Transistors  
and Improved Stability Through Co-Doping with Alkali Metals**

Jingjing Chang,<sup>a</sup> Zhenhua Lin,<sup>b</sup> Ming Lin,<sup>c</sup> Chunxiang Zhu,<sup>b</sup> Jie Zhang,<sup>c,\*</sup> and Jishan Wu<sup>a,c,\*</sup>

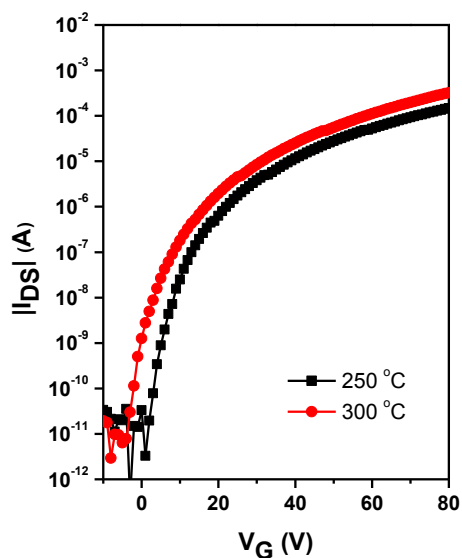

**Fig. S1** The transfer characteristics of the F doped ZnO TFTs under different annealing temperatures.

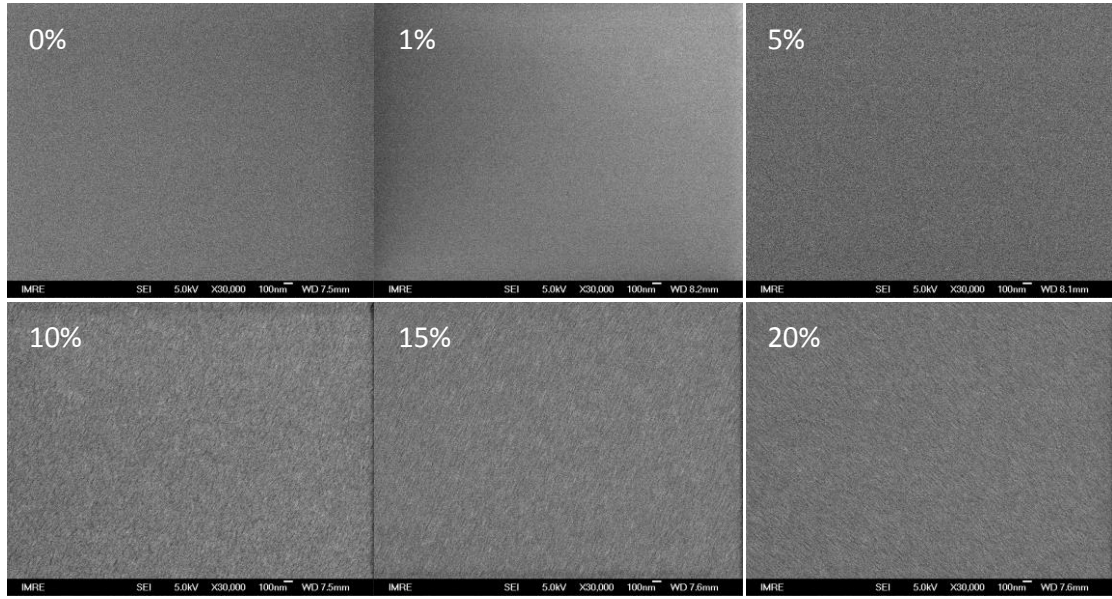

**Fig. S2** The FESEM images of the F-doped ZnO films with different molar ratios.

**Table S1.** The electrical characteristics of solution processed Li doped ZnO TFTs as a function of the doping content.

| Li content (ratio) | $\mu[\text{cm}^2\text{V}^{-1}\text{s}^{-1}](\mu_{\text{max}})$ | $V_T$ [V] | On/off |
|--------------------|----------------------------------------------------------------|-----------|--------|
| 1%                 | 1.8(3.1)                                                       | 27-31     | $10^7$ |
| 5%                 | 4.8(5.7)                                                       | 27-32     | $10^7$ |
| 10%                | 5.3(6.5)                                                       | 28-33     | $10^7$ |

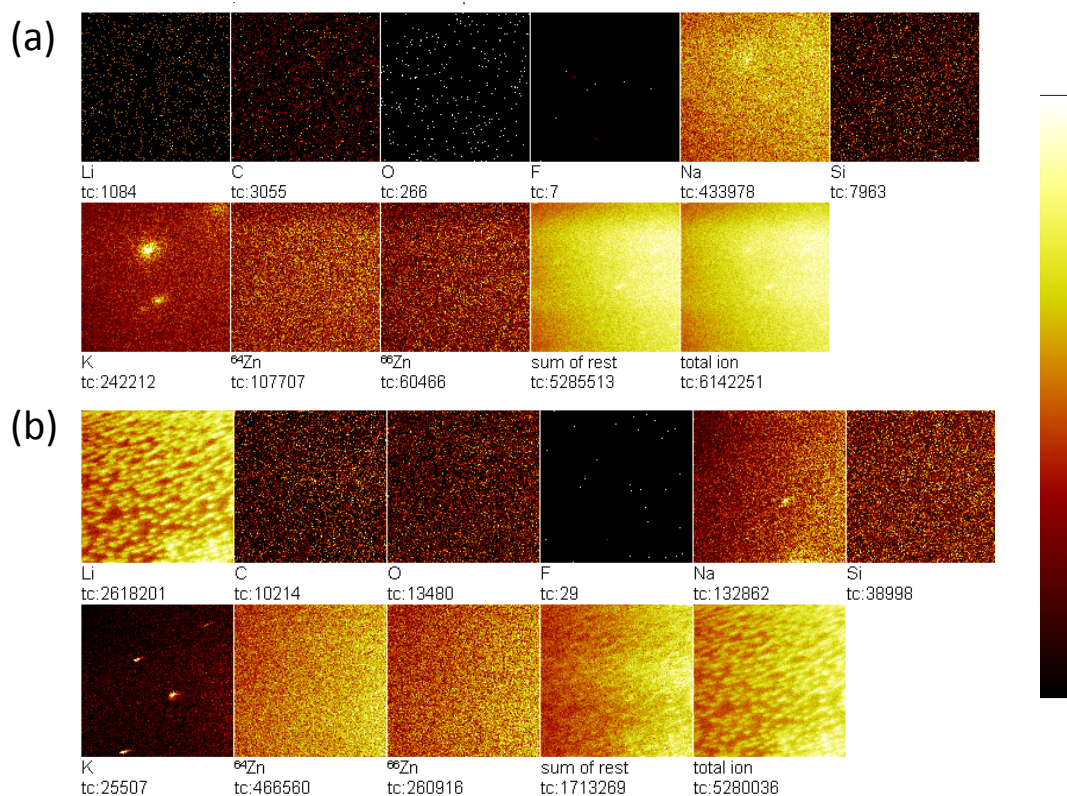

**Fig S3.** The TOF-SIMS results of the pristine (a) and 10% LiF doped ZnO (b) after thermal annealing at 300 °C for 1h in air.

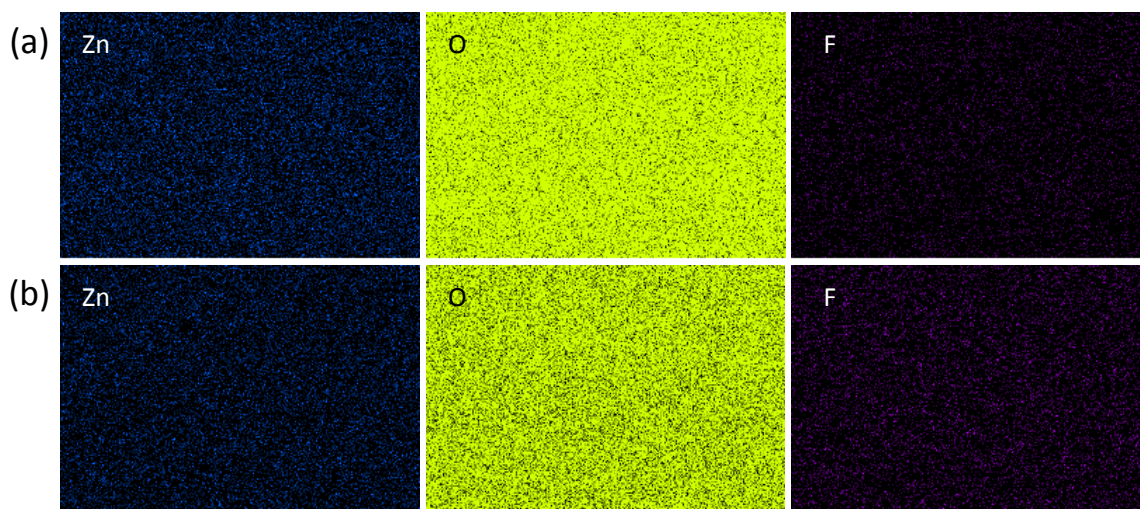

**Fig. S4** The EDX elemental mapping of Zn, O, F for the pristine (a) and 10% LiF doped ZnO (b) after thermal annealing at 300 °C for 1h in air.

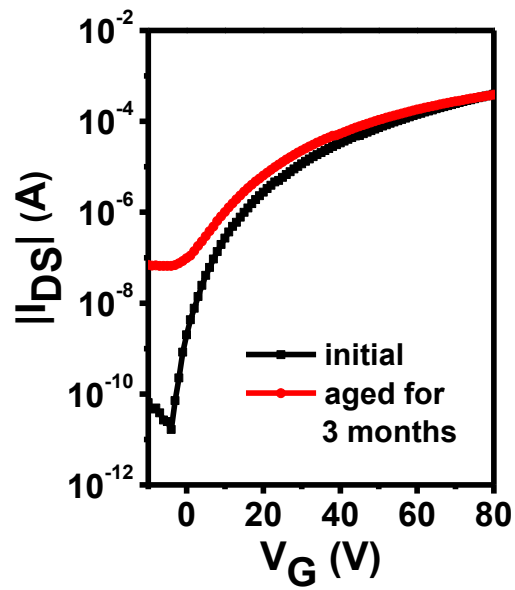

**Fig. S5** The transfer characteristics of the F doped ZnO TFTs with aged precursor solution.
